# Supplementary material for: ChIP-exo interrogation of Crp, DNA, and RNAP holoenzyme interactions
Source: PLoS One. 2018 May 17;13(5):e0197272. doi: 10.1371/journal.pone.0197272 (PMC5957442; doi:10.1371/journal.pone.0197272)
Supplement: S1 Table — This table contains the identity of the 699 promoters which make up the trimodal distribution in Fig 1 of the manuscript. The first column is the transcription start site which all of the peak distributions shown in the paper were centered off of. The second column is genomic strand. The third column is the ID of the transcription unit. The third and fourth columns contain lists of the gene names and gene locus IDs contained within the transcription unit of the corresponding promoter. The fifth column contains the peak mode. Mode 1 corresponds to peaks that were 5-20bp in width, Mode 2 corresponds to peaks that were 21-40bp in width, Mode 3 corresponds to peaks that were 41-60bp in width. (CSV) [file pone.0197272.s007.csv]

transcription_start_site	strand	transcription_unit_id	transcription_unit_gene_names	transcription_unit_gene_ids	mode
2371293	-	TU0-41981	['pmrD']	['b2259']	1
925447	-	infA	['infA']	['b0884']	1
2817402	-	alaS	['alaS']	['b2697']	1
4429299	+	TU0-14159	['cycA']	['b4208']	1
141967	+	hpt	['hpt']	['b0125']	1
658473	-	TU0-13004	['lipA']	['b0628']	1
2221922	+	TU0-41948	['dld']	['b2133']	1
564037	-	intD	['intD']	['b0537']	1
709422	-	fldA-fur	['fur', 'uof', 'fldA']	['b0683', 'b4637', 'b0684']	1
4076461	+	TU0-14070	['yihX', 'yihY', 'dtd', 'yiiD']	['b3885', 'b3886', 'b3887', 'b3888']	1
147943	-	panBC	['panC', 'panB']	['b0133', 'b0134']	1
3937207	-	TU0-14033	['hsrA', 'yieP']	['b3754', 'b3755']	1
971868	+	TU0-13089	['ycbJ']	['b0919']	1
5020	+	thrLABC	['thrL', 'thrA', 'thrB', 'thrC']	['b0001', 'b0002', 'b0003', 'b0004']	1
1937115	+	TU0-14633	['pykA']	['b1854']	1
1789330	-	TU0-13377	['ydiV']	['b1707']	1
1085328	-	pgaABCD	['pgaD', 'pgaC', 'pgaB', 'pgaA']	['b1021', 'b1022', 'b1023', 'b1024']	1
4619625	+	deoBD	['deoB', 'deoD']	['b4383', 'b4384']	1
1328405	+	sohB	['sohB']	['b1272']	1
2796112	-	stpA	['stpA']	['b2669']	1
642779	-	TU0-12996	['rnk']	['b0610']	1
668518	-	TU0-13010	['cobC', 'nadD', 'holA', 'lptE', 'leuS']	['b0638', 'b0639', 'b0640', 'b0641', 'b0642']	1
1025779	-	TU0-13100	['mgsA']	['b0963']	1
376758	-	TU0-12902	['frmB', 'frmA', 'frmR']	['b0355', 'b0356', 'b0357']	1
4504428	+	TU0-14183	['yjhB', 'yjhC']	['b4279', 'b4280']	1
1664547	-	TU0-13338	['ynfK']	['b1593']	1
4125248	+	rpmE	['rpmE']	['b3936']	1
1386285	+	tyrR	['tyrR']	['b1323']	1
2169856	-	gatYZABCD	['gatD', 'gatC', 'gatB', 'gatA', 'gatZ', 'gatY']	['b2091', 'b2092', 'b2093', 'b2094', 'b2095', 'b2096']	1
4375215	+	sugE	['sugE']	['b4148']	1
4042067	+	rdoA-dsbA	['rdoA', 'dsbA']	['b3859', 'b3860']	1
394353	-	ampH	['ampH']	['b0376']	1
3484774	+	crp	['crp']	['b3357']	1
853988	+	TU0-41602	['mntR', 'ybiR']	['b0817', 'b0818']	1
3346260	+	rpoN-hpf-ptsN-yhbJ-npr	['rpoN', 'hpf', 'ptsN', 'yhbJ', 'npr']	['b3202', 'b3203', 'b3204', 'b3205', 'b3206']	1
2641150	-	rlmN	['rlmN']	['b2517']	1
2083727	-	TU0-13490	['plaP']	['b2014']	1
959318	+	serC-aroA	['serC', 'aroA']	['b0907', 'b0908']	1
1309832	+	tonB	['tonB']	['b1252']	1
1838798	+	TU0-13389	['ynjE']	['b1757']	1
3782606	-	TU0-13997	['yibN']	['b3611']	1
785908	+	aroG	['aroG']	['b0754']	1
1978211	-	otsBA	['otsA', 'otsB']	['b1896', 'b1897']	1
429700	+	yajC-secDF	['yajC', 'secD', 'secF']	['b0407', 'b0408', 'b0409']	1
926696	-	cydDC	['cydC', 'cydD']	['b0886', 'b0887']	1
1740585	+	cfa	['cfa']	['b1661']	1
4560765	-	TU0-14201	['yjiK']	['b4333']	1
1942369	-	ruvAB	['ruvB', 'ruvA']	['b1860', 'b1861']	1
2689677	-	purL	['purL']	['b2557']	1
4187596	+	rplKAJL-rpoBC	['rplK', 'rplA', 'rplJ', 'rplL', 'rpoB', 'rpoC']	['b3983', 'b3984', 'b3985', 'b3986', 'b3987', 'b3988']	1
3146998	-	TU0-42132	['yqhA']	['b3002']	1
1029981	-	TU0-13105	['yccA']	['b0970']	1
3924034	-	TU0-14030	['mioC']	['b3742']	1
3845327	-	ivbL-ilvBN-uhpABC	['uhpC', 'uhpB', 'uhpA', 'ilvN', 'ilvB', 'ivbL']	['b3667', 'b3668', 'b3669', 'b3670', 'b3671', 'b3672']	1
1810349	+	ydjN	['ydjN']	['b1729']	1
3472699	-	TU0-13915	['tusB', 'tusC', 'tusD', 'yheO']	['b3343', 'b3344', 'b3345', 'b3346']	1
573751	-	nmpC	['nmpC']	['b0553']	1
490483	+	TU0-41523	['ybaN']	['b0468']	1
2257740	-	fruBKA	['fruA', 'fruK', 'fruB']	['b2167', 'b2168', 'b2169']	1
1702700	+	TU0-13351	['blr']	['b4409']	1
1128597	+	murJ	['murJ']	['b1069']	1
3090850	+	TU0-42110	['rsmE', 'gshB']	['b2946', 'b2947']	1
87848	+	ilvIH	['ilvI', 'ilvH']	['b0077', 'b0078']	1
4388479	-	TU0-14150	['rsgA']	['b4161']	1
3108282	+	TU0-42115	['yqgA']	['b2966']	1
4432644	-	cpdB	['cpdB']	['b4213']	1
1672995	-	pntAB	['pntB', 'pntA']	['b1602', 'b1603']	1
1113029	+	yceK	['yceK']	['b1050']	1
497043	+	adk	['adk']	['b0474']	1
2767508	+	TU0-42063	['yfjP', 'yfjQ']	['b2632', 'b2633']	1
1718413	-	slyA	['slyA']	['b1642']	1
1843022	-	selD-topB	['topB', 'selD']	['b1763', 'b1764']	1
1529663	+	yncI	['yncI']	['b1459']	1
173601	-	hemL	['hemL']	['b0154']	1
1822426	+	cho	['cho']	['b1741']	1
2969155	+	TU0-13748	['ygdQ']	['b2832']	1
3040315	+	ygfZ	['ygfZ']	['b2898']	1
4116867	-	rraA	['rraA']	['b3929']	1
904962	-	TU0-13074	['ybjS']	['b0868']	1
159185	-	dksA-yadB	['gluQ', 'dksA']	['b0144', 'b0145']	1
2165053	+	TU0-13505	['yegQ']	['b2081']	1
2700502	-	rnc-era	['era', 'rnc']	['b2566', 'b2567']	1
2371669	-	menFD-yfbB-menBCE	['menE', 'menC', 'menB', 'menH', 'menD', 'menF']	['b2260', 'b2261', 'b2262', 'b2263', 'b2264', 'b2265']	1
4468344	+	mgtA	['mgtL', 'mgtA']	['b4702', 'b4242']	1
3127058	+	glcC	['glcC']	['b2980']	1
1997608	-	fliAZY	['fliY', 'fliZ', 'fliA']	['b1920', 'b1921', 'b1922']	1
3376891	-	TU0-42203	['yhcM']	['b3232']	1
1310374	-	TU0-13190	['yciB', 'yciC']	['b1254', 'b1255']	1
1808072	+	TU0-13383	['yniC']	['b1727']	1
1145233	-	TU0-41664	['yceF']	['b1087']	1
3617012	+	nikABCDER	['nikA', 'nikB', 'nikC', 'nikD', 'nikE', 'nikR']	['b3476', 'b3477', 'b3478', 'b3479', 'b3480', 'b3481']	1
1970859	-	motAB-cheAW	['cheW', 'cheA', 'motB', 'motA']	['b1887', 'b1888', 'b1889', 'b1890']	1
1736893	+	purR	['purR']	['b1658']	1
1404566	+	ydaL	['smrA']	['b1340']	1
4482462	-	TU0-14175	['pepA']	['b4260']	1
1710182	+	rsxABCDGE-nth	['rsxA', 'rsxB', 'rsxC', 'rsxD', 'rsxG', 'rsxE', 'nth']	['b1627', 'b1628', 'b1629', 'b1630', 'b1631', 'b1632', 'b1633']	1
2531402	+	cysK	['cysK']	['b2414']	1
2436963	-	TU0-13592	['yfcJ']	['b2322']	1
1883813	+	TU0-13411	['yeaV', 'yeaW']	['b1801', 'b1802']	1
145017	+	yadI	['yadI']	['b0129']	1
2729621	-	clpB	['clpB']	['b2592']	1
4610024	+	osmY	['osmY']	['b4376']	1
1146763	+	yceD-rpmF	['yceD', 'rpmF']	['b1088', 'b1089']	1
3571797	-	asd	['asd']	['b3433']	1
213677	-	TU0-12834	['rof', 'yaeP']	['b0189', 'b4406']	1
4390950	-	queG	['queG']	['b4166']	1
1260150	-	lolB-ispE-prs	['prs', 'ispE', 'lolB']	['b1207', 'b1208', 'b1209']	1
3931207	+	TU0-14663	['kup']	['b3747']	1
3937242	+	rbsDACBKR	['rbsD', 'rbsA', 'rbsC', 'rbsB', 'rbsK', 'rbsR']	['b3748', 'b3749', 'b3750', 'b3751', 'b3752', 'b3753']	1
4600110	-	yjjP	['yjjP']	['b4364']	1
1005713	-	ycbX	['ycbX']	['b0947']	1
3433183	+	def-fmt	['def', 'fmt']	['b3287', 'b3288']	1
4229249	+	rluF	['rluF']	['b4022']	1
3978719	+	TU0-14039	['wecA', 'wzzE', 'wecB', 'wecC', 'rffG', 'rffH', 'wecD', 'wecE', 'wzxE', 'wecF', 'wzyE', 'wecG']	['b3784', 'b3785', 'b3786', 'b3787', 'b3788', 'b3789', 'b3790', 'b3791', 'b3792', 'b4481', 'b3793', 'b3794']	1
3828359	+	TU0-14005	['xanP']	['b3654']	1
1228499	+	TU0-41705	['ycgN']	['b1181']	1
3957468	+	ilvC	['ilvC']	['b3774']	1
3189760	-	glgS	['glgS']	['b3049']	1
235538	+	yafS	['yafS']	['b0213']	1
4504648	-	yjhD	['yjhD']	['b4281']	1
1266150	+	hemA-prfA-prmC	['hemA', 'prfA', 'prmC']	['b1210', 'b1211', 'b1212']	1
1639362	-	cspB	['cspB']	['b1557']	1
3383195	+	argR	['argR']	['b3237']	1
2458671	-	TU0-13597	['yfcZ']	['b2343']	1
1212550	-	TU0-13158	['bluR']	['b1162']	1
3307054	-	rpsO-pnp	['pnp', 'rpsO']	['b3164', 'b3165']	1
2822512	-	mltB	['mltB']	['b2701']	1
398248	-	TU0-41509	['yaiY']	['b0379']	1
1848717	+	TU0-13391	['sppA']	['b1766']	1
405446	+	TU0-12914	['yaiI']	['b0387']	1
2454348	-	sixA	['sixA']	['b2340']	1
1231722	-	TU0-13172	['dsbB']	['b1185']	1
3853136	-	TU0-42322	['yidF']	['b3674']	1
3013760	+	TU0-13780	['mocA']	['b2877']	1
173444	+	fhuACDB	['fhuA', 'fhuC', 'fhuD', 'fhuB']	['b0150', 'b0151', 'b0152', 'b0153']	1
3183152	+	TU0-13841	['yqiC']	['b3042']	1
3398065	-	mreB	['mreB']	['b3251']	1
2720635	+	TU0-13671	['yfiP', 'pka']	['b2583', 'b2584']	1
455655	+	tig	['tig']	['b0436']	1
2904605	+	TU0-42074	['ygcG']	['b2778']	1
2106360	-	rfbBDACX	['wzxB', 'rfbC', 'rfbA', 'rfbD', 'rfbB']	['b2037', 'b2038', 'b2039', 'b2040', 'b2041']	1
3909861	-	glmUS	['glmS', 'glmU']	['b3729', 'b3730']	1
1821309	+	TU0-13386	['nadE']	['b1740']	1
661974	-	TU0-41561	['dacA']	['b0632']	1
3706806	-	TU0-13975	['eptB']	['b3546']	1
4488163	-	idnR	['idnR']	['b4264']	1
4134038	+	katG	['katG']	['b3942']	1
3399413	-	TU0-13904	['csrD']	['b3252']	1
4176311	+	secE-nusG	['secE', 'nusG']	['b3981', 'b3982']	1
193429	+	TU0-12830	['frr']	['b0172']	1
1496535	+	TU0-41773	['opgD']	['b1424']	1
83621	-	leuL	['leuL']	['b0075']	1
4019889	+	ubiE-yigP-ubiB	['ubiE', 'yigP', 'ubiB']	['b3833', 'b3834', 'b3835']	1
2042472	+	TU0-13471	['mtfA']	['b1976']	1
291455	+	yagJ	['yagJ']	['b0276']	1
1501149	+	TU0-41775	['ydcL']	['b1431']	1
3553812	+	malT	['malT']	['b3418']	1
4188757	-	thiCEFSGH	['thiH', 'thiG', 'thiS', 'thiF', 'thiE', 'thiC']	['b3990', 'b3991', 'b4407', 'b3992', 'b3993', 'b3994']	1
1325751	+	rluB	['rluB']	['b1269']	1
1018160	+	matP	['matP']	['b0956']	1
3323022	-	rlmE-ftsH	['ftsH', 'rlmE']	['b3178', 'b3179']	1
146313	-	panD	['panD']	['b0131']	1
1909718	-	htpX	['htpX']	['b1829']	1
4126100	-	metJ	['metJ']	['b3938']	1
1333482	+	TU0-13198	['ymiA', 'yciX']	['b4522', 'b4523']	1
89032	+	TU0-12808	['cra']	['b0080']	1
266407	-	TU0-12860	['yafZ', 'ykfA']	['b0252', 'b0253']	1
900088	-	artPIQM	['artM', 'artQ', 'artI', 'artP']	['b0861', 'b0862', 'b0863', 'b0864']	1
1803348	-	TU0-41842	['ydiY']	['b1722']	1
256435	+	gpt	['gpt']	['b0238']	1
2245084	-	lysP	['lysP']	['b2156']	1
4116783	+	yiiU	['zapB']	['b3928']	1
2325388	-	TU0-13563	['yfaP', 'yfaQ', 'yfaT', 'yfaA']	['b2225', 'b2226', 'b2229', 'b2230']	1
1395695	-	TU0-13221	['uspE']	['b1333']	1
3913575	-	atpIBEFHAGDC	['atpC', 'atpD', 'atpG', 'atpA', 'atpH', 'atpF', 'atpE', 'atpB', 'atpI']	['b3731', 'b3732', 'b3733', 'b3734', 'b3735', 'b3736', 'b3737', 'b3738', 'b3739']	1
294362	-	TU0-41480	['yagN']	['b0280']	1
1066086	-	TU0-13114	['yccJ', 'wrbA']	['b1003', 'b1004']	1
1424106	+	TU0-13234	['ynaK', 'ydaY']	['b1365', 'b1366']	1
914574	-	aqpZ	['aqpZ']	['b0875']	1
4101519	+	TU0-14077	['yiiM']	['b3910']	1
3663008	-	gadX	['gadX']	['b3516']	1
2722469	-	TU0-42050	['kgtP']	['b2587']	1
3239210	+	TU0-13860	['sstT']	['b3089']	1
3347102	-	TU0-13890	['mtgA', 'elbB']	['b3208', 'b3209']	2
1269460	-	ldrC	['ldrC']	['b4423']	2
107474	+	TU0-12809	['lpxC']	['b0096']	2
3796261	-	rfaQGPSBIJYZ-waaU	['waaU', 'waaZ', 'waaY', 'waaJ', 'waaR', 'waaB', 'waaS', 'waaP', 'waaG', 'waaQ']	['b3623', 'b3624', 'b3625', 'b3626', 'b3627', 'b3628', 'b3629', 'b3630', 'b3631', 'b3632']	2
1211925	-	TU0-41700	['ycgX']	['b1161']	2
4277851	+	TU0-14123	['yjcD']	['b4064']	2
3351142	-	TU0-13891	['yhcC']	['b3211']	2
2017537	+	fliFGHIJK	['fliF', 'fliG', 'fliH', 'fliI', 'fliJ', 'fliK']	['b1938', 'b1939', 'b1940', 'b1941', 'b1942', 'b1943']	2
882014	-	ybjG	['ybjG']	['b0841']	2
4367178	-	yjeH	['yjeH']	['b4141']	2
3253229	+	TU0-42168	['yhaK', 'yhaL']	['b3106', 'b3107']	2
3430012	-	smg	['smg']	['b3284']	2
1797416	-	infC-rpmI-rplT	['rplT', 'rpmI', 'infC']	['b1716', 'b1717', 'b1718']	2
1990897	-	uvrYC	['uvrC', 'uvrY']	['b1913', 'b1914']	2
4402327	+	miaA-hfq-hflXKC	['miaA', 'hfq', 'hflX', 'hflK', 'hflC']	['b4171', 'b4172', 'b4173', 'b4174', 'b4175']	2
4363494	-	aspA-dcuA	['dcuA', 'aspA']	['b4138', 'b4139']	2
2234764	-	mglBAC	['mglC', 'mglA', 'mglB']	['b2148', 'b2149', 'b2150']	2
2530246	+	TU0-13622	['cysZ']	['b2413']	2
573093	+	TU0-12975	['ybcN', 'ninE', 'ybcO', 'rusA', 'ylcG']	['b0547', 'b0548', 'b0549', 'b0550', 'b4509']	2
1608930	-	TU0-13302	['yneF']	['b1522']	2
1321061	-	trpL	['trpL']	['b1265']	2
1518088	+	TU0-13272	['curA']	['b1449']	2
1306985	+	yciY	['yciY']	['b4595']	2
4084872	+	fdhD	['fdhD']	['b3895']	2
4631109	+	trpR	['trpR']	['b4393']	2
1195596	+	icd	['icd']	['b1136']	2
3148839	-	exbBD	['exbD', 'exbB']	['b3005', 'b3006']	2
4493212	-	TU0-42411	['yjgB']	['b4269']	2
3320194	-	secG	['secG']	['b3175']	2
4439560	-	msrA	['msrA']	['b4219']	2
2431033	-	accD	['accD']	['b2316']	2
195664	+	ispU	['ispU']	['b0174']	2
2068498	+	yoeA	['yoeA']	['b4582']	2
1168634	-	TU0-13138	['ycfS']	['b1113']	2
245064	-	TU0-12848	['yafK']	['b0224']	2
3031678	-	prfB-lysS	['lysS', 'prfB']	['b2890', 'b2891']	2
463010	+	ppiD	['ppiD']	['b0441']	2
2577638	+	TU0-14644	['talA']	['b2464']	2
2720635	+	pka	['pka']	['b2584']	2
2885599	-	cysJIH	['cysH', 'cysI', 'cysJ']	['b2762', 'b2763', 'b2764']	2
1910791	-	TU0-13425	['prc', 'proQ']	['b1830', 'b1831']	2
2944102	-	TU0-13743	['mltA']	['b2813']	2
425305	+	queA	['queA']	['b0405']	2
1975289	-	flhDC	['flhC', 'flhD']	['b1891', 'b1892']	2
1822385	-	ves	['ves']	['b1742']	2
3468166	-	tufA	['tufA']	['b3339']	2
687219	-	TU0-13015	['insH1']	['b0656']	2
2181737	-	TU0-13512	['thiD', 'thiM']	['b2103', 'b2104']	2
3698002	-	ldrD	['ldrD']	['b4453']	2
1985452	+	ftnB	['ftnB']	['b1902']	2
2517227	+	yfeCD	['yfeC', 'yfeD']	['b2398', 'b2399']	2
1924806	+	TU0-13434	['yobB', 'exoX']	['b1843', 'b1844']	2
446038	-	cyoABCDE	['cyoE', 'cyoD', 'cyoC', 'cyoB', 'cyoA']	['b0428', 'b0429', 'b0430', 'b0431', 'b0432']	2
2588828	-	TU0-14237	['ypfM']	['b4606']	2
631222	+	cstA	['cstA']	['b0598']	2
2474532	+	torI	['torI']	['b4501']	2
2748136	-	grpE	['grpE']	['b2614']	2
2639852	-	TU0-42034	['rodZ']	['b2516']	2
2213786	+	TU0-13528	['yohO']	['b4542']	2
3813149	-	rph-pyrE	['pyrE', 'rph']	['b3642', 'b3643']	2
3165872	-	TU0-14791	['mqsA', 'mqsR']	['b3021', 'b3022']	2
607211	+	hokE	['hokE']	['b4415']	2
1701258	+	TU0-13350	['add']	['b1623']	2
4229906	-	lysC	['lysC']	['b4024']	2
3409589	+	dusB-fis	['dusB', 'fis']	['b3260', 'b3261']	2
3676442	-	yhjH	['yhjH']	['b3525']	2
4263752	+	TU0-14119	['dnaB']	['b4052']	2
1837424	+	TU0-13388	['ydjX', 'ydjY', 'ydjZ', 'ynjA', 'ynjB', 'ynjC', 'ynjD']	['b1750', 'b1751', 'b1752', 'b1753', 'b1754', 'b1755', 'b1756']	2
660859	-	ybeD-lipB	['lipB', 'ybeD']	['b0630', 'b0631']	2
1486059	+	TU0-13252	['ydcF']	['b1414']	2
176954	+	erpA	['erpA']	['b0156']	2
2231861	+	TU0-13537	['sanA', 'yeiS']	['b2144', 'b2145']	2
1005001	+	pyrD	['pyrD']	['b0945']	2
692753	-	miaB	['miaB']	['b0661']	2
3557869	-	glpEGR	['glpR', 'glpG', 'glpE']	['b3423', 'b3424', 'b3425']	2
505826	-	ybaK	['ybaK']	['b0481']	2
988376	-	pncB	['pncB']	['b0931']	2
773404	+	cydAB	['cydA', 'cydB']	['b0733', 'b0734']	2
2111457	-	galF	['wcaN']	['b2042']	2
1904274	-	TU0-13421	['rlmA']	['b1822']	2
3557869	-	glpGR	['glpR', 'glpG']	['b3423', 'b3424']	2
1258292	+	ychH	['ychH']	['b1205']	2
479313	-	TU0-41521	['hha']	['b0460']	2
3245450	+	exuR	['exuR']	['b3094']	2
824224	-	TU0-13050	['ybhR', 'ybhS', 'ybhF', 'ybhG', 'ybiH']	['b0792', 'b0793', 'b0794', 'b0795', 'b0796']	2
232596	-	TU0-41462	['mltD']	['b0211']	2
764272	+	sdhCDAB-sucABCD	['sdhC', 'sdhD', 'sdhA', 'sdhB', 'sucA', 'sucB', 'sucC', 'sucD']	['b0721', 'b0722', 'b0723', 'b0724', 'b0726', 'b0727', 'b0728', 'b0729']	2
235534	-	rnhA	['rnhA']	['b0214']	2
2163545	+	yegP	['yegP']	['b2080']	2
824263	+	ybhQ	['ybhQ']	['b0791']	2
4625317	+	serB-radA	['serB', 'radA']	['b4388', 'b4389']	2
3237567	+	TU0-42159	['alx']	['b3088']	2
2938121	+	fucR	['fucR']	['b2805']	2
2416655	-	yfcD	['yfcD']	['b2299']	2
3637164	+	pitA	['pitA']	['b3493']	2
963335	+	rpsA-ihfB	['rpsA', 'ihfB']	['b0911', 'b0912']	2
4363494	-	dcuA	['dcuA']	['b4138']	2
3825314	+	rpoZ-spoT-trmH-recG	['rpoZ', 'spoT', 'trmH', 'recG']	['b3649', 'b3650', 'b3651', 'b3652']	2
3882875	+	rpmH-rnpA	['rpmH', 'rnpA']	['b3703', 'b3704']	2
3446335	-	rpsJ-rplCDWB-rpsS-rplV-rpsC-rplP-rpmC-rpsQ	['rpsQ', 'rpmC', 'rplP', 'rpsC', 'rplV', 'rpsS', 'rplB', 'rplW', 'rplD', 'rplC', 'rpsJ']	['b3311', 'b3312', 'b3313', 'b3314', 'b3315', 'b3316', 'b3317', 'b3318', 'b3319', 'b3320', 'b3321']	2
244121	+	TU0-12846	['gmhA']	['b0222']	2
1952437	+	TU0-13443	['yecN', 'cmoA', 'cmoB']	['b1869', 'b1870', 'b1871']	2
1223501	-	minCDE	['minE', 'minD', 'minC']	['b1174', 'b1175', 'b1176']	2
2962382	-	lgt-thyA	['thyA', 'lgt']	['b2827', 'b2828']	2
939943	+	TU0-13080	['serS']	['b0893']	2
2904664	-	eno	['eno']	['b2779']	2
3607905	+	TU0-13944	['yhhQ']	['b3471']	2
563070	-	fimZ	['fimZ']	['b0535']	2
3893241	+	TU-8419	['yieE', 'chrR']	['b3712', 'b3713']	2
2612841	-	yfgO	['yfgO']	['b2493']	2
2280961	-	yejK	['yejK']	['b2186']	2
699596	-	nagC	['nagC']	['b0676']	2
4048155	-	yihA	['yihA']	['b3865']	2
4517360	-	TU0-42422	['yjhU']	['b4295']	2
1347003	-	TU0-13203	['yciW']	['b1287']	2
4347337	-	dcuR	['dcuR']	['b4124']	2
4342951	-	yjdF	['yjdF']	['b4121']	2
4218355	+	aceBAK	['aceB', 'aceA', 'aceK']	['b4014', 'b4015', 'b4016']	2
407329	+	yaiA-aroM	['yaiA', 'aroM']	['b0389', 'b0390']	2
1395646	+	ynaJ	['ynaJ']	['b1332']	2
2615959	+	TU0-14645	['yfgC', 'yfgD']	['b2494', 'b2495']	2
706980	+	glnS	['glnS']	['b0680']	2
913180	-	TU0-13076	['ybjE']	['b0874']	2
1167422	-	TU0-41671	['ycfQ']	['b1111']	2
1733983	+	sodB	['sodB']	['b1656']	2
129336	+	lpdA	['lpd']	['b0116']	2
2249719	+	nfo	['nfo']	['b2159']	2
1672971	+	tqsA	['tqsA']	['b1601']	2
2149734	-	TU0-13501	['yegK', 'yegL']	['b2072', 'b2073']	2
3638568	+	uspA	['uspA']	['b3495']	2
2309667	-	ompC	['ompC']	['b2215']	2
1085279	+	phoH	['phoH']	['b1020']	2
3694019	-	yhjR	['yhjR']	['b3535']	2
2028471	-	dcm-vsr	['vsr', 'dcm']	['b1960', 'b1961']	2
1950237	+	TU0-13442	['yecD', 'yecE']	['b1867', 'b1868']	2
288524	-	argF	['argF']	['b0273']	2
1682207	+	rstAB	['rstA', 'rstB']	['b1608', 'b1609']	2
2000133	-	fliC	['fliC']	['b1923']	2
4447144	-	ppA	['ppa']	['b4226']	2
120177	-	aroP	['aroP']	['b0112']	2
917350	-	ybjX	['ybjX']	['b0877']	2
2210264	-	TU0-13526	['yehT', 'yehU']	['b2125', 'b2126']	2
2836275	-	ascG	['ascG']	['b2714']	2
3875089	-	TU0-14020	['yidB']	['b3698']	2
2864580	-	rpoS	['rpoS']	['b2741']	2
218886	-	TU0-12837	['tsaA', 'rcsF']	['b0195', 'b0196']	2
2547667	-	TU0-42019	['yfeX']	['b2431']	2
2892793	+	TU0-13728	['ygcN', 'ygcO', 'ygcP']	['b2766', 'b2767', 'b2768']	2
4408557	+	nsrR-rnr-rlmB-yjfI	['nsrR', 'rnr', 'rlmB', 'yjfI']	['b4178', 'b4179', 'b4180', 'b4181']	2
601080	+	cusCFBA	['cusC', 'cusF', 'cusB', 'cusA']	['b0572', 'b0573', 'b0574', 'b0575']	2
1246918	-	dhaKLM	['dhaM', 'dhaL', 'dhaK']	['b1198', 'b1199', 'b1200']	2
3097703	-	ansB	['ansB']	['b2957']	2
709339	+	ybfMN	['chiP', 'chiQ']	['b0681', 'b0682']	2
2590984	+	dapE-ypfN	['dapE', 'ypfN']	['b2472', 'b4547']	2
421583	+	TU0-12918	['brnQ', 'proY']	['b0401', 'b0402']	2
1339751	+	TU0-13200	['yciS', 'yciM']	['b1279', 'b1280']	2
2438406	-	fabB	['fabB']	['b2323']	2
4000399	+	corA	['corA']	['b3816']	2
2595852	-	dapA-nlpB	['bamC', 'dapA']	['b2477', 'b2478']	2
2714087	-	yfiD	['grcA']	['b2579']	2
818970	+	moaABCDE	['moaA', 'moaB', 'moaC', 'moaD', 'moaE']	['b0781', 'b0782', 'b0783', 'b0784', 'b0785']	2
1703188	+	TU0-41821	['cnu']	['b1625']	2
3653277	-	hdeAB-yhiD	['yhiD', 'hdeB', 'hdeA']	['b3508', 'b3509', 'b3510']	2
3055199	-	serA	['serA']	['b2913']	2
460947	+	hupB	['hupB']	['b0440']	2
1015105	+	TU0-41629	['rmf']	['b0953']	2
114521	-	TU0-12811	['hofC', 'hofB', 'ppdD']	['b0106', 'b0107', 'b0108']	2
950494	-	focA-pflB	['pflB', 'focA']	['b0903', 'b0904']	2
2594926	-	purC	['purC']	['b2476']	2
1268390	-	ldrA	['ldrA']	['b4419']	2
1946773	-	aspS	['aspS']	['b1866']	2
1905249	-	TU0-13422	['cspC', 'yobF']	['b1823', 'b1824']	2
4330027	+	proP	['proP']	['b4111']	2
1613709	+	TU0-13305	['yneJ']	['b1526']	2
4240648	-	malEFG	['malG', 'malF', 'malE']	['b4032', 'b4033', 'b4034']	2
2280823	+	TU0-41966	['rplY']	['b2185']	2
2751968	+	smpA	['bamE']	['b2617']	2
4003754	+	TU0-14046	['pldA']	['b3821']	2
1417788	-	TU0-41749	['racR']	['b1356']	2
2388069	-	nuoABCEFGHIJKLMN	['nuoN', 'nuoM', 'nuoL', 'nuoK', 'nuoJ', 'nuoI', 'nuoH', 'nuoG', 'nuoF', 'nuoE', 'nuoC', 'nuoB', 'nuoA']	['b2276', 'b2277', 'b2278', 'b2279', 'b2280', 'b2281', 'b2282', 'b2283', 'b2284', 'b2285', 'b2286', 'b2287', 'b2288']	2
491187	+	TU0-12947	['apt']	['b0469']	2
3780664	-	TU0-13995	['gpsA', 'secB']	['b3608', 'b3609']	2
1272468	-	ychN	['ychN']	['b1219']	2
2585453	+	TU0-13641	['narQ']	['b2469']	2
1181005	-	potABCD	['potD', 'potC', 'potB', 'potA']	['b1123', 'b1124', 'b1125', 'b1126']	2
2095249	+	hisLGDCBHAFI	['hisL', 'hisG', 'hisD', 'hisC', 'hisB', 'hisH', 'hisA', 'hisF', 'hisI']	['b2018', 'b2019', 'b2020', 'b2021', 'b2022', 'b2023', 'b2024', 'b2025', 'b2026']	2
2407483	+	alaA-yfbR	['alaA', 'yfbR']	['b2290', 'b2291']	2
4157430	+	oxyR	['oxyR']	['b3961']	2
3323022	-	TU0-42188	['ftsH']	['b3178']	2
111433	+	secMA-mutT	['secM', 'secA', 'mutT']	['b0097', 'b0098', 'b0099']	2
1990292	-	pgsA	['pgsA']	['b1912']	2
656724	+	cspE	['cspE']	['b0623']	2
3796230	+	rfaDFCL	['hldD', 'waaF', 'waaC', 'waaL']	['b3619', 'b3620', 'b3621', 'b3622']	2
1177787	+	TU0-13141	['lolC', 'lolD', 'lolE']	['b1116', 'b1117', 'b1118']	2
1015105	+	rmf	['rmf']	['b0953']	2
2441912	-	TU0-13593	['yfcL', 'epmC', 'yfcA', 'mepA', 'aroC', 'prmB']	['b2325', 'b2326', 'b2327', 'b2328', 'b2329', 'b2330']	2
856778	+	ybiT	['ybiT']	['b0820']	2
1348274	-	TU0-13204	['fabI']	['b1288']	2
2765377	+	rnlAB	['rnlA', 'rnlB']	['b2630', 'b2631']	2
1140404	-	rne	['rne']	['b1084']	2
4413923	+	aidB	['aidB']	['b4187']	2
3608538	-	yhhS	['yhhS']	['b3473']	2
3540986	+	feoABC	['feoA', 'feoB', 'feoC']	['b3408', 'b3409', 'b3410']	2
2494587	+	lpxP	['lpxP']	['b2378']	2
4006461	-	rhtB	['rhtB']	['b3824']	2
1489945	-	hokB	['hokB']	['b4428']	2
129336	+	pdhR-aceEF-lpdA	['pdhR', 'aceE', 'aceF', 'lpd']	['b0113', 'b0114', 'b0115', 'b0116']	2
457924	+	clpPX	['clpP', 'clpX']	['b0437', 'b0438']	2
640541	+	ahpCF	['ahpC', 'ahpF']	['b0605', 'b0606']	2
400870	+	TU0-14613	['iraP']	['b0382']	2
1798119	-	infC	['infC']	['b1718']	2
985116	-	ompF	['ompF']	['b0929']	2
1841738	+	gdhA	['gdhA']	['b1761']	2
1793276	-	pheMST-ihfA	['ihfA', 'pheT', 'pheS', 'pheM']	['b1712', 'b1713', 'b1714', 'b1715']	2
2095344	-	TU0-41919	['wzzB']	['b2027']	2
3756039	-	selAB	['selB', 'selA']	['b3590', 'b3591']	2
3381351	-	mdh	['mdh']	['b3236']	2
1618231	+	marRAB	['marR', 'marA', 'marB']	['b1530', 'b1531', 'b1532']	2
583653	+	appY	['appY']	['b0564']	2
1294668	-	adhE	['adhE']	['b1241']	2
983520	+	TU0-13091	['ycbK', 'ycbL']	['b0926', 'b0927']	2
1386328	-	tpx	['tpx']	['b1324']	2
1243014	+	emtA	['emtA']	['b1193']	2
3759369	-	TU0-13988	['yibF']	['b3592']	2
3468166	-	rpsLG-fusA-tufA	['tufA', 'fusA', 'rpsG', 'rpsL']	['b3339', 'b3340', 'b3341', 'b3342']	2
1312682	+	ompW	['ompW']	['b1256']	2
1898052	-	yoaE	['yoaE']	['b1816']	2
1935545	+	TU0-13439	['yebK']	['b1853']	2
3875727	-	gyrB	['gyrB']	['b3699']	2
4257144	+	lexA-dinF	['lexA', 'dinF']	['b4043', 'b4044']	2
478004	-	TU0-12941	['ylaC']	['b0458']	2
1811444	-	cedA	['cedA']	['b1731']	2
460466	+	lon	['lon']	['b0439']	2
1710182	+	ydgK-rsxABCDGE-nth	['ydgK', 'rsxA', 'rsxB', 'rsxC', 'rsxD', 'rsxG', 'rsxE', 'nth']	['b1626', 'b1627', 'b1628', 'b1629', 'b1630', 'b1631', 'b1632', 'b1633']	2
3171133	+	TU0-42140	['mdaB']	['b3028']	2
4571939	+	yjiT	['yjiT']	['b4342']	2
3375836	-	rplM-rpsI	['rpsI', 'rplM']	['b3230', 'b3231']	2
1392914	-	ynaI	['ynaI']	['b1330']	2
2239831	-	TU0-13539	['yeiB', 'folE']	['b2152', 'b2153']	2
1098047	+	TU0-13119	['ghrA']	['b1033']	2
3044189	-	gcvTHP	['gcvP', 'gcvH', 'gcvT']	['b2903', 'b2904', 'b2905']	2
3561541	+	glpD	['glpD']	['b3426']	2
3889506	+	tnaCAB	['tnaC', 'tnaA', 'tnaB']	['b3707', 'b3708', 'b3709']	2
3064298	-	ygfI	['ygfI']	['b2921']	2
142007	-	can	['can']	['b0126']	2
3820074	+	TU0-14004	['gmk']	['b3648']	2
1694485	-	uidR	['uidR']	['b1618']	2
1349851	-	TU0-13206	['sapF', 'sapD', 'sapC', 'sapB', 'sapA']	['b1290', 'b1291', 'b1292', 'b1293', 'b1294']	2
2517227	+	TU0-42017	['yfeC', 'yfeD']	['b2398', 'b2399']	2
1487695	+	aldA	['aldA']	['b1415']	2
4424580	+	rpsF-priB-rpsR-rplI	['rpsF', 'priB', 'rpsR', 'rplI']	['b4200', 'b4201', 'b4202', 'b4203']	2
2347956	-	glpTQ	['glpQ', 'glpT']	['b2239', 'b2240']	2
850236	-	ybiP	['ybiP']	['b0815']	2
1345001	-	rnb	['rnb']	['b1286']	2
3405288	+	accBC	['accB', 'accC']	['b3255', 'b3256']	2
3160765	-	plsC	['plsC']	['b3018']	2
3811974	+	dfp	['dfp']	['b3639']	2
3680183	-	dctA	['dctA']	['b3528']	2
3155472	+	yqhD-dkgA	['yqhD', 'dkgA']	['b3011', 'b3012']	2
3328418	+	dacB	['dacB']	['b3182']	2
1120783	-	pyrC	['pyrC']	['b1062']	2
3716356	-	yiaF	['yiaF']	['b3554']	2
261980	+	TU0-41467	['proB', 'proA']	['b0242', 'b0243']	2
1050185	-	TU0-41642	['cspH']	['b0989']	2
3209018	+	rpsU	['rpsU']	['b3065']	2
3002029	-	ygeV	['ygeV']	['b2869']	2
1806680	+	TU0-41843	['yniA']	['b1725']	2
2928965	+	sdaCB	['sdaC', 'sdaB']	['b2796', 'b2797']	2
2736927	+	pheLA	['pheL', 'pheA']	['b2598', 'b2599']	2
1268925	-	ldrB	['ldrB']	['b4421']	2
220112	-	metNIQ	['metQ', 'metI', 'metN']	['b0197', 'b0198', 'b0199']	2
107474	+	mraZW-ftsLI-murEF-mraY-murD-ftsW-murGC-ddlB-ftsQAZ-lpxC	['mraZ', 'rsmH', 'ftsL', 'ftsI', 'murE', 'murF', 'mraY', 'murD', 'ftsW', 'murG', 'murC', 'ddlB', 'ftsQ', 'ftsA', 'ftsZ', 'lpxC']	['b0081', 'b0082', 'b0083', 'b0084', 'b0085', 'b0086', 'b0087', 'b0088', 'b0089', 'b0090', 'b0091', 'b0092', 'b0093', 'b0094', 'b0095', 'b0096']	2
3489746	-	ppiA	['ppiA']	['b3363']	2
507783	+	TU0-41531	['ybaQ']	['b0483']	2
1742854	+	mdtK	['mdtK']	['b1663']	2
1005717	+	TU0-41628	['zapC']	['b0946']	2
1018235	-	ompA	['ompA']	['b0957']	2
209580	+	accA	['accA']	['b0185']	2
1635632	-	TU0-13319	['gnsB']	['b1550']	2
4213232	+	metA	['metA']	['b4013']	2
3077665	-	TU0-13802	['tktA']	['b2935']	2
1997608	-	fliY	['fliY']	['b1920']	2
2904664	-	TU0-14654	['eno', 'pyrG']	['b2779', 'b2780']	2
1731777	-	grxD	['grxD']	['b1654']	2
2816982	-	TU0-13716	['csrA']	['b2696']	2
1522392	+	yncE	['yncE']	['b1452']	2
3202242	-	TU0-13848	['folB']	['b3058']	2
848432	-	TU0-13058	['rhtA']	['b0813']	2
185122	-	dapD	['dapD']	['b0166']	2
2056226	-	TU0-13477	['yeeO']	['b1985']	2
4104343	+	cpxP	['cpxP']	['b4484']	2
3476613	-	TU0-13918	['yheV', 'kefB', 'kefG']	['b4551', 'b3350', 'b3351']	2
1988916	+	tyrP	['tyrP']	['b1907']	2
3464242	+	TU0-13913	['gspC', 'gspD', 'gspE', 'gspF', 'gspG', 'gspH', 'gspI', 'gspJ', 'gspK', 'gspL', 'gspM', 'gspO']	['b3324', 'b3325', 'b3326', 'b3327', 'b3328', 'b3329', 'b3330', 'b3331', 'b3332', 'b3333', 'b3334', 'b3335']	2
4160153	+	TU0-14097	['fabR', 'yijD']	['b3963', 'b3964']	2
229966	-	yafC	['yafC']	['b0208']	2
1986569	+	yecR	['yecR']	['b1904']	2
2315048	-	TU0-41971	['rcsC']	['b2218']	2
430176	+	TU0-12919	['yajD']	['b0410']	2
3152244	+	TU0-13822	['yghB']	['b3009']	2
3437637	-	rpsMKD-rpoA-rplQ	['rplQ', 'rpoA', 'rpsD', 'rpsK', 'rpsM']	['b3294', 'b3295', 'b3296', 'b3297', 'b3298']	2
1331669	+	topA	['topA']	['b1274']	2
2627503	+	TU0-13647	['yfgG']	['b2504']	2
4578090	-	hsdMS	['hsdS', 'hsdM']	['b4348', 'b4349']	2
1793276	-	ihfA	['ihfA']	['b1712']	2
2882574	-	ygcB	['ygcB']	['b2761']	2
4112591	-	glpFKX	['glpX', 'glpK', 'glpF']	['b3925', 'b3926', 'b3927']	2
4021535	+	tatABC	['tatA', 'tatB', 'tatC', 'tatD']	['b3836', 'b3838', 'b3839', 'b4483']	2
2982432	-	TU0-13757	['yqeF']	['b2844']	2
160148	-	sfsA-dksA	['dksA', 'sfsA']	['b0145', 'b0146']	2
4187596	+	rplJL-rpoBC	['rplJ', 'rplL', 'rpoB', 'rpoC']	['b3985', 'b3986', 'b3987', 'b3988']	2
875886	+	TU0-13064	['yliE', 'yliF']	['b0833', 'b0834']	2
4188348	+	yjaZ	['yjaZ']	['b3989']	2
2314849	+	rcsB	['rcsB']	['b2217']	2
4547733	+	fimAICDFGH	['fimA', 'fimI', 'fimC', 'fimD', 'fimF', 'fimG', 'fimH']	['b4314', 'b4315', 'b4316', 'b4317', 'b4318', 'b4319', 'b4320']	2
4377029	-	frdABCD	['frdD', 'frdC', 'frdB', 'frdA']	['b4151', 'b4152', 'b4153', 'b4154']	2
1733274	+	TU0-13359	['ydhO']	['b1655']	2
4437894	-	TU0-14164	['ytfL']	['b4218']	2
3307054	-	pnp	['pnp']	['b3164']	2
3678466	-	yhjJ	['yhjJ']	['b3527']	2
1287004	-	TU0-41711	['purU']	['b1232']	2
776830	+	ybgC-tolQRA	['ybgC', 'tolQ', 'tolR', 'tolA']	['b0736', 'b0737', 'b0738', 'b0739']	2
4469008	-	pyrLBI	['pyrI', 'pyrB', 'pyrL']	['b4244', 'b4245', 'b4246']	2
4293817	+	TU0-14126	['gltP']	['b4077']	2
709422	-	fur	['fur']	['b0683']	2
3464270	-	TU0-13914	['bfr', 'bfd']	['b3336', 'b3337']	2
4198576	+	hupA	['hupA']	['b4000']	2
356678	+	codBA	['codB', 'codA']	['b0336', 'b0337']	2
3171525	-	TU0-13837	['parE', 'yqiA', 'cpdA', 'yqiB', 'nudF']	['b3030', 'b3031', 'b3032', 'b3033', 'b3034']	2
54754	-	imp	['lptD']	['b0054']	2
4637612	-	arcA	['arcA']	['b4401']	2
407685	+	TU0-12915	['yaiE']	['b0391']	2
1151074	+	acpP	['acpP']	['b1094']	2
980009	+	smtA-mukFEB	['smtA', 'mukF', 'mukE', 'mukB']	['b0921', 'b0922', 'b0923', 'b0924']	2
3957554	-	TU0-14034	['ppiC']	['b3775']	2
3634230	-	yhiN	['yhiN']	['b3492']	2
4531261	-	TU0-14195	['yjhQ', 'yjhX']	['b4307', 'b4566']	2
2346790	+	nrdAB-yfaE	['nrdA', 'nrdB', 'yfaE']	['b2234', 'b2235', 'b2236']	2
4006400	+	TU0-14048	['rhtC']	['b3823']	2
464075	-	queC	['queC']	['b0444']	2
983741	-	aspC	['aspC']	['b0928']	2
2086327	-	TU0-13492	['yeeZ']	['b2016']	2
3161736	-	TU0-13830	['parC']	['b3019']	2
1291731	-	hns	['hns']	['b1237']	2
2495078	-	alaC	['alaC']	['b2379']	2
1015174	-	fabA	['fabA']	['b0954']	2
4148469	-	ppc	['ppc']	['b3956']	2
2209747	-	yehS	['yehS']	['b2124']	2
1439348	+	ydbJ	['ydbJ']	['b4529']	2
2732324	-	TU0-13675	['yfiH', 'rluD']	['b2593', 'b2594']	2
3359962	+	gltBDF	['gltB', 'gltD', 'gltF']	['b3212', 'b3213', 'b3214']	2
2742204	-	rpsP-rimM-trmD-rplS	['rplS', 'trmD', 'rimM', 'rpsP']	['b2606', 'b2607', 'b2608', 'b2609']	2
3739131	-	ysaA	['ysaA']	['b3573']	2
3904875	-	pstSCAB-phoU	['phoU', 'pstB', 'pstA', 'pstC', 'pstS']	['b3724', 'b3725', 'b3726', 'b3727', 'b3728']	2
3766188	+	yibJ	['yibJ']	['b3595']	2
3644250	+	TU0-13958	['rlmJ']	['b3499']	2
3718284	+	cspA	['cspA']	['b3556']	2
3040510	-	TU0-13789	['yqfA']	['b2899']	2
9191	+	talB	['talB']	['b0008']	2
407329	+	aroL-yaiA-aroM	['aroL', 'yaiA', 'aroM']	['b0388', 'b0389', 'b0390']	3
3347106	+	yrbL	['yrbL']	['b3207']	3
436331	+	nrdR-ribDE-nusB-thiL-pgpA	['nrdR', 'ribD', 'ribE', 'nusB', 'thiL', 'pgpA']	['b0413', 'b0414', 'b0415', 'b0416', 'b0417', 'b0418']	3
2139657	-	dcd	['dcd']	['b2065']	3
552440	-	TU0-12963	['lpxH', 'ppiB']	['b0524', 'b0525']	3
3720350	-	glyQS	['glyS', 'glyQ']	['b3559', 'b3560']	3
660859	-	TU0-41560	['lipB']	['b0630']	3
2409460	-	TU0-13582	['yfbT', 'yfbU']	['b2293', 'b2294']	3
1871555	+	TU0-13402	['yeaJ']	['b1786']	3
3108611	-	TU0-42116	['yghD']	['b2968']	3
3497223	+	nirBDC-cysG	['nirB', 'nirD', 'nirC', 'cysG']	['b3365', 'b3366', 'b3367', 'b3368']	3
3333256	-	ibaG-murA	['murA', 'ibaG']	['b3189', 'b3190']	3
2500009	+	TU0-13613	['ypdA', 'ypdB', 'ypdC']	['b2380', 'b2381', 'b2382']	3
1755681	+	lpp	['lpp']	['b1677']	3
3699886	-	dppABCDF	['dppF', 'dppD', 'dppC', 'dppB', 'dppA']	['b3540', 'b3541', 'b3542', 'b3543', 'b3544']	3
2534365	+	ptsHI-crr	['ptsH', 'ptsI', 'crr']	['b2415', 'b2416', 'b2417']	3
2682275	-	glyA	['glyA']	['b2551']	3
1960603	-	flhBAE	['flhE', 'flhA', 'flhB']	['b1878', 'b1879', 'b1880']	3
1627062	+	TU0-13311	['ydfH']	['b1540']	3
185977	-	glnD	['glnD']	['b0167']	3
2534365	+	crr	['crr']	['b2417']	3
3998168	+	uvrD	['uvrD']	['b3813']	3
711260	-	TU0-13023	['ybfF']	['b0686']	3
1239557	-	TU0-13174	['cvrA']	['b1191']	3
2558920	+	yffL	['yffL']	['b2443']	3
489122	+	TU0-12944	['mscK']	['b0465']	3
4257510	-	TU0-42375	['zur']	['b4046']	3
2773043	+	TU0-13698	['yfjW']	['b2642']	3
2541853	-	TU0-13623	['ucpA']	['b2426']	3
3611579	+	acpT	['acpT']	['b3475']	3
442221	+	thiI	['thiI']	['b0423']	3
1099417	+	TU0-13120	['ycdX', 'ycdY']	['b1034', 'b1035']	3
3895462	+	TU0-14025	['yieH']	['b3715']	3
1755134	+	pykF	['pykF']	['b1676']	3
344873	+	TU0-12897	['yahM']	['b0327']	3
1293367	+	TU0-41713	['tdk']	['b1238']	3
2697945	+	yfhL	['yfhL']	['b2562']	3
1093457	+	ycdT	['ycdT']	['b1025']	3
1048661	-	TU0-13108	['gfcA']	['b0987']	3
3311363	-	rimP-nusA-infB	['infB', 'nusA', 'rimP']	['b3168', 'b3169', 'b3170']	3
3374300	-	sspAB	['sspB', 'sspA']	['b3228', 'b3229']	3
3486981	-	argD	['argD']	['b3359']	3
710827	-	ybfE	['ybfE']	['b0685']	3
2897509	-	TU0-13732	['ygcW']	['b2774']	3
4404008	+	purA	['purA']	['b4177']	3
2662267	+	suhB	['suhB']	['b2533']	3
3058668	+	argP	['argP']	['b2916']	3
1112629	+	mdoGH	['opgG', 'opgH']	['b1048', 'b1049']	3
4229381	-	yjbD	['yjbD']	['b4023']	3
2685091	-	glnB	['glnB']	['b2553']	3
1631329	+	TU0-13315	['ydfK']	['b1544']	3
3597951	-	rpoH	['rpoH']	['b3461']	3
4516825	+	TU0-42421	['insA']	['b4294']	3
1798119	-	thrS-infC	['infC', 'thrS']	['b1718', 'b1719']	3
2901396	+	TU0-13733	['yqcE', 'ygcE']	['b2775', 'b2776']	3
493247	+	TU0-12948	['dnaX']	['b0470']	3
134212	+	acnB	['acnB']	['b0118']	3
1713049	-	TU0-14629	['pdxY', 'tyrS']	['b1636', 'b1637']	3
663324	-	TU0-13009	['rlpA', 'mrdB', 'mrdA', 'rlmH', 'rsfS']	['b0633', 'b0634', 'b0635', 'b0636', 'b0637']	3
2705343	-	rpoE-rseABC	['rseC', 'rseB', 'rseA', 'rpoE']	['b2570', 'b2571', 'b2572', 'b2573']	3
2334814	-	gyrA	['gyrA']	['b2231']	3
3809272	-	rpmBG	['rpmG', 'rpmB']	['b3636', 'b3637']	3
2183545	-	TU0-13513	['rcnR']	['b2105']	3
452812	-	yajG	['yajG']	['b0434']	3
479313	-	TU0-12943	['hha', 'tomB']	['b0460', 'b0461']	3
3964113	+	trxA	['trxA']	['b3781']	3
2268567	+	TU0-13550	['spr']	['b2175']	3
2911720	-	TU0-13735	['rlmD']	['b2785']	3
2432103	-	pdxB-usg-truA-dedA	['dedA', 'truA', 'usg', 'pdxB']	['b2317', 'b2318', 'b2319', 'b2320']	3
1396797	-	fnr	['fnr']	['b1334']	3
1863749	-	TU0-13400	['mipA']	['b1782']	3
4632463	-	rob	['rob']	['b4396']	3
3127064	-	yghO	['yghO']	['b2981']	3
2964209	-	TU0-13746	['ptsP', 'rppH']	['b2829', 'b2830']	3
4225534	+	metH	['metH']	['b4019']	3
4479004	-	valS	['valS']	['b4258']	3
2194355	+	TU0-13519	['metG']	['b2114']	3
3573743	-	gntRKU	['gntU', 'gntK', 'gntR']	['b4476', 'b3437', 'b3438']	3
4598260	-	dnaTC	['dnaC', 'dnaT']	['b4361', 'b4362']	3
1887974	-	tsaB-yeaY	['yeaY', 'tsaB']	['b1806', 'b1807']	3
2736969	-	aroF-tyrA	['tyrA', 'aroF']	['b2600', 'b2601']	3
1191889	-	mnmA	['mnmA']	['b1133']	3
2052983	+	shiA	['shiA']	['b1981']	3
3674131	+	TU0-42279	['yhjE']	['b3523']	3
1232398	-	TU0-13173	['nhaB']	['b1186']	3
3475928	-	TU0-13917	['slyD']	['b3349']	3
2802483	+	nrdHIEF	['nrdH', 'nrdI', 'nrdE', 'nrdF']	['b2673', 'b2674', 'b2675', 'b2676']	3
986807	-	TU0-13093	['asnS']	['b0930']	3
436384	-	yajO	['yajO']	['b0419']	3
2633624	+	xseA	['xseA']	['b2509']	3
2277809	-	TU0-13555	['rsuA']	['b2183']	3
4500125	-	insG	['insG']	['b4278']	3
583902	-	ompT	['ompT']	['b0565']	3
3603271	+	TU0-42262	['rsmD', 'yhhL']	['b3465', 'b3466']	3
4457334	+	TU0-14167	['pmbA']	['b4235']	3
1234880	+	fadR	['fadR']	['b1187']	3
3212988	-	mug	['mug']	['b3068']	3
4372651	-	TU0-14143	['epmB']	['b4146']	3
4043692	-	yihG	['yihG']	['b3862']	3
4106537	+	pfkA	['pfkA']	['b3916']	3
1913654	-	msrC	['msrC']	['b1832']	3
2314849	+	rcsDB	['rcsD', 'rcsB']	['b2216', 'b2217']	3
473524	-	tesB	['tesB']	['b0452']	3
4578090	-	hsdRMS	['hsdS', 'hsdM', 'hsdR']	['b4348', 'b4349', 'b4350']	3
4058253	+	TU0-42347	['typA']	['b3871']	3
1787831	-	ydiU	['ydiU']	['b1706']	3
1782757	-	pps	['ppsA']	['b1702']	3
2712252	+	srmB	['srmB']	['b2576']	3
202556	+	fabZ	['fabZ']	['b0180']	3
550749	-	purEK	['purK', 'purE']	['b0522', 'b0523']	3
4269071	-	uvrA	['uvrA']	['b4058']	3
3851665	+	tisB	['tisB']	['b4618']	3
157252	-	pcnB-folK	['folK', 'pcnB']	['b0142', 'b0143']	3
3330883	-	rplU-rpmA	['rpmA', 'rplU']	['b3185', 'b3186']	3
3596577	-	livJ	['livJ']	['b3460']	3
2616096	-	hda	['hda']	['b2496']	3
3440639	-	rplNXE-rpsNH-rplFR-rpsE-rpmD-rplO-secY-rpmJ	['rpmJ', 'secY', 'rplO', 'rpmD', 'rpsE', 'rplR', 'rplF', 'rpsH', 'rpsN', 'rplE', 'rplX', 'rplN']	['b3299', 'b3300', 'b3301', 'b3302', 'b3303', 'b3304', 'b3305', 'b3306', 'b3307', 'b3308', 'b3309', 'b3310']	3
4260729	+	TU0-42376	['dusA']	['b4049']	3
4324421	-	TU0-14132	['yjdM']	['b4108']	3
2485989	+	evgAS	['evgA', 'evgS']	['b2369', 'b2370']	3
3590746	-	livKHMGF	['livF', 'livG', 'livM', 'livH', 'livK']	['b3454', 'b3455', 'b3456', 'b3457', 'b3458']	3
1718367	+	slyB	['slyB']	['b1641']	3
2722104	+	TU0-42048	['pssA']	['b2585']	3
2616892	-	upp-uraA	['uraA', 'upp']	['b2497', 'b2498']	3
2190536	-	TU0-41943	['yehE']	['b2112']	3
844963	-	glnHPQ	['glnQ', 'glnP', 'glnH']	['b0809', 'b0810', 'b0811']	3
436331	+	ribE-nusB-thiL-pgpA	['ribE', 'nusB', 'thiL', 'pgpA']	['b0415', 'b0416', 'b0417', 'b0418']	3
2741631	+	yfiRN	['yfiR', 'yfiN']	['b2603', 'b2604']	3
3410822	+	TU0-13906	['yhdU']	['b3263']	3
1255943	-	ychF	['ychF']	['b1203']	3
3371719	-	TU0-42201	['nanR']	['b3226']	3
1368027	+	pspE	['pspE']	['b1308']	3
1768210	+	ydiK	['ydiK']	['b1688']	3
217056	-	proS	['proS']	['b0194']	3
3523610	-	TU0-42239	['nudE']	['b3397']	3
921588	-	cspD	['cspD']	['b0880']	3
4078321	-	TU0-42358	['fdhE']	['b3891']	3
183708	-	yaeH	['yaeH']	['b0163']	3
2997157	-	TU0-13771	['ygeR']	['b2865']	3
3838571	-	nepI	['nepI']	['b3662']	3
3645727	-	dinQ	['dinQ']	['b4613']	3
1260150	-	prs	['prs']	['b1207']	3
3862634	-	TU0-14017	['yidE']	['b3685']	3
1762957	-	TU0-41836	['ydiH']	['b1685']	3
3069480	-	epd-pgk	['pgk', 'epd']	['b2926', 'b2927']	3
59686	-	TU0-3841	['rluA', 'rapA']	['b0058', 'b0059']	3
962891	+	cmk-rpsA	['cmk', 'rpsA']	['b0910', 'b0911']	3
3577790	-	TU0-42253	['yhhX']	['b3440']	3
1489456	+	TU0-13253	['cybB']	['b1418']	3
4121453	-	cytR	['cytR']	['b3934']	3
3049136	-	TU0-13792	['visC', 'ubiH', 'pepP', 'ygfB']	['b2906', 'b2907', 'b2908', 'b2909']	3
2055598	+	TU0-13476	['yeeN']	['b1983']	3
4194354	-	rsd	['rsd']	['b3995']	3
387976	-	TU0-12908	['hemB']	['b0369']	3
2468484	+	TU0-13601	['gtrA', 'gtrB', 'gtrS']	['b2350', 'b2351', 'b2352']	3
3475880	+	slyX	['slyX']	['b3348']	3
4272684	+	ssb	['ssb']	['b4059']	3
